# Supplementary material for: Newly Diagnosed Multifocal GBM: A Monocentric Experience and Literature Review
Source: MDPI journal article supplement (doi:10.3390/curroncol29050280), 2022-05-11
Supplement: s1 [file s1]

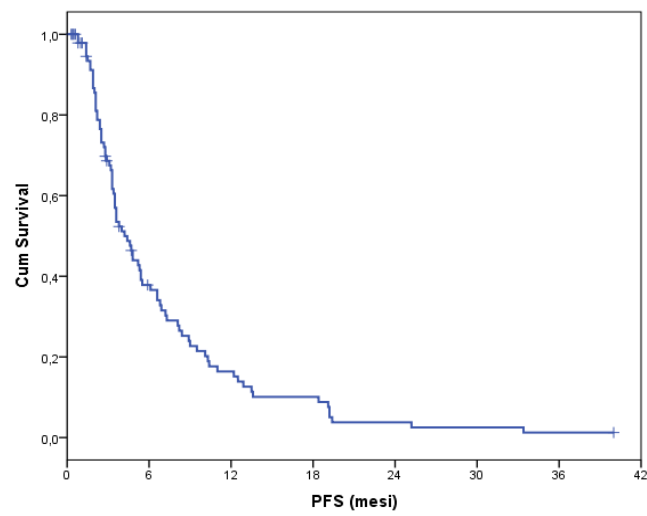

**Figure S1.** Progression-free survival of the study population (median PFS =4.2 months).

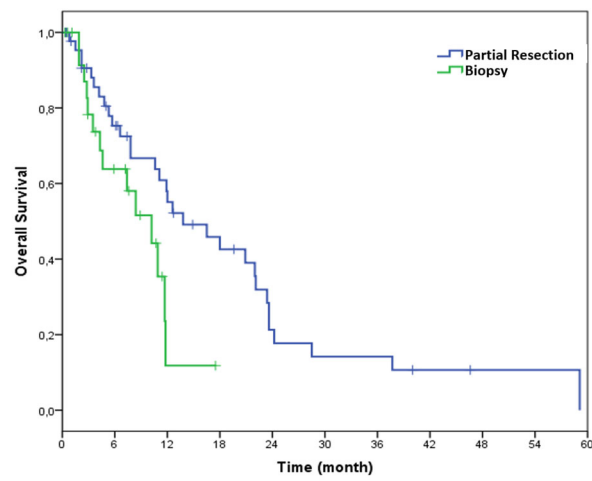

**Figure S2.** OS Kaplan-Meier curves for the extent of resection: partial resection (median OS=13.8 months) vs biopsy (median OS=10.2 months).

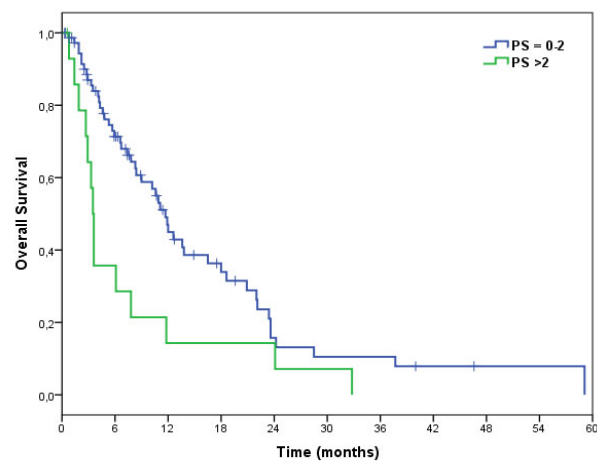

**Figure S3.** OS Kaplan-Meier curves for the ECOG PS: 0-2 (median OS=11.7 months) vs >2 (median OS=3.5 months).

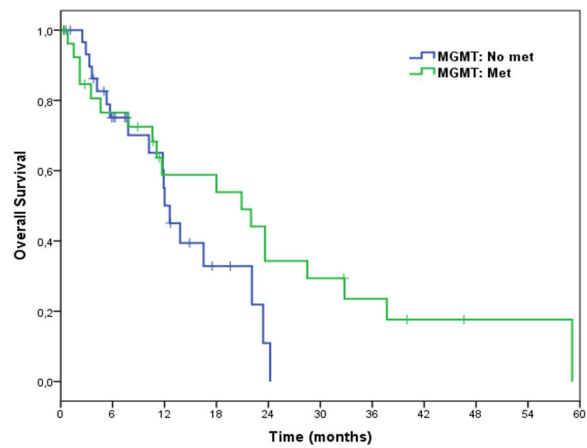

**Figure S4.** OS Kaplan-Meier curves for the MGMT status: MGMT methylated (median OS=20.9 months) vs MGMT unmethylated (median OS=12.6 months).

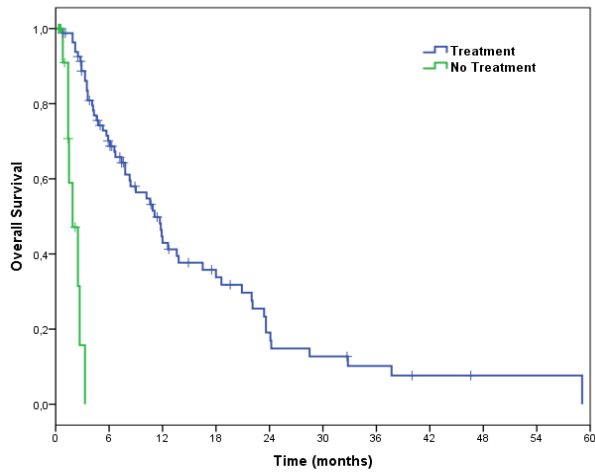

**Figure S5.** OS Kaplan-Meier curves for the active oncological treatment: yes (median OS=11.1 months) vs no (median OS=1.9 months).

**Table S1.** Progression-free survival (PFS) analysis using the Kaplan-Meier method and log-rank test.

|                                 | Total<br>N | N of<br>Events | Median<br>PFS | IC 95%  | P value |
|---------------------------------|------------|----------------|---------------|---------|---------|
| Extent of resection             |            |                |               |         | 0.007   |
| PR                              | 45         | 40             | 6.6           | 5.0-8.2 |         |
| Biopsy                          | 26         | 20             | 3.6           | 2.6-4.6 |         |
| ECOG PS                         |            |                |               |         | 0.331   |
| 0-2                             | 74         | 63             | 4.8           | 3.5-6.1 |         |
| >2                              | 15         | 14             | 3.3           | 2.0-4.6 |         |
| MGMT status                     |            |                |               |         | 0.137   |
| Unmet                           | 31         | 27             | 6.8           | 5.0-8.6 |         |
| Met                             | 28         | 24             | 5.4           | 2.2-8.6 |         |
| Active oncological<br>treatment |            |                |               |         | <0.001  |

|        |     |    |    |     |         |
|--------|-----|----|----|-----|---------|
|        | Yes | 82 | 74 | 4.8 | 3.7-5.9 |
|        | No  | 16 | 9  | 1.7 | 1.2-2.3 |
| <hr/>  |     |    |    |     |         |
| RT+TMZ |     |    |    |     | <0.001  |
|        | Yes | 54 | 50 | 6.9 | 4.9-8.9 |
|        | No  | 44 | 33 | 2.4 | 1.9-2.9 |

ECOG PS=Eastern Cooperative Oncology Group Performance Status; MGMT= O-6-methylguanine DNA methyltransferase; RT=Radiotherapy; TMZ=Temozolomide

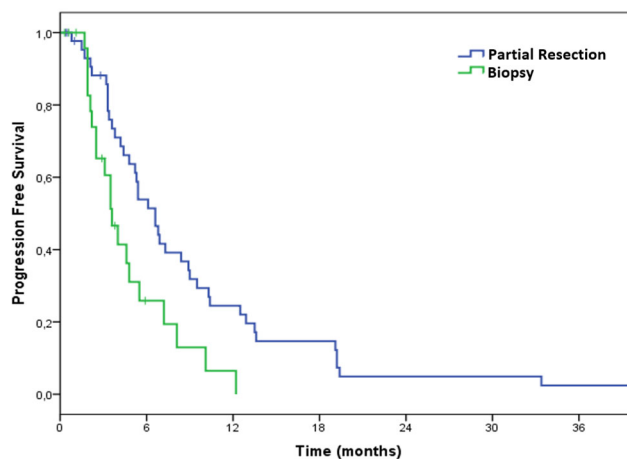

**Figure S6.** PFS Kaplan-Meier curves for the extent of resection: partial resection (median PFS=6.6 months) vs biopsy (median PFS=3.6 months).

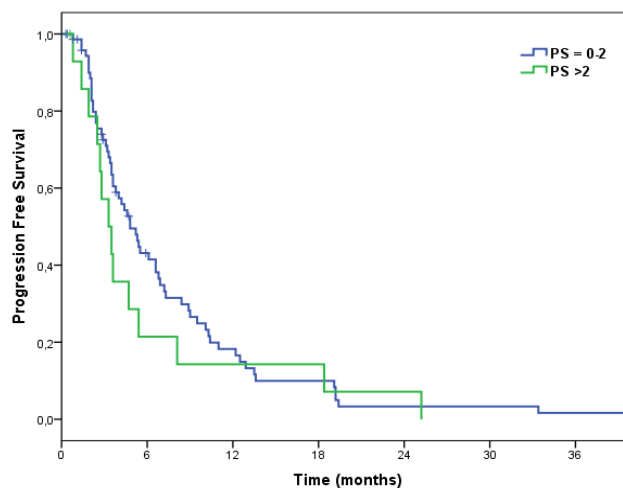

**Figure S7.** PFS Kaplan-Meier curves for the ECOG PS: 0-2 (median PFS=4.8 months) vs >2 (median PFS=3.3 months).

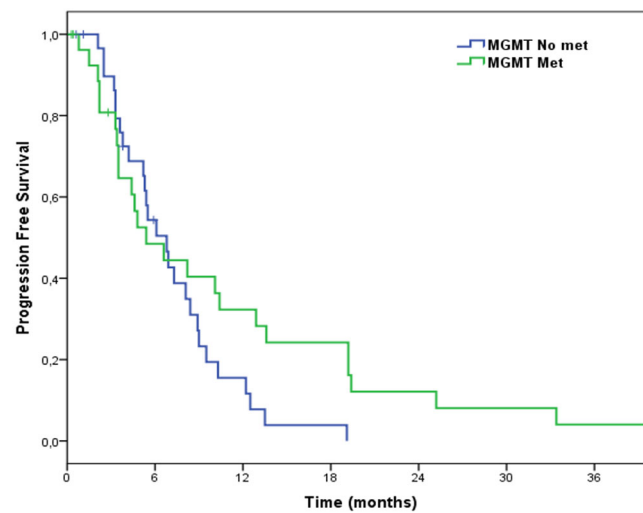

**Figure S8.** PFS Kaplan-Meier curves for the MGMT status: MGMT methylated (median PFS=5.4 months) vs MGMT unmethylated (median PFS=6.8 months).

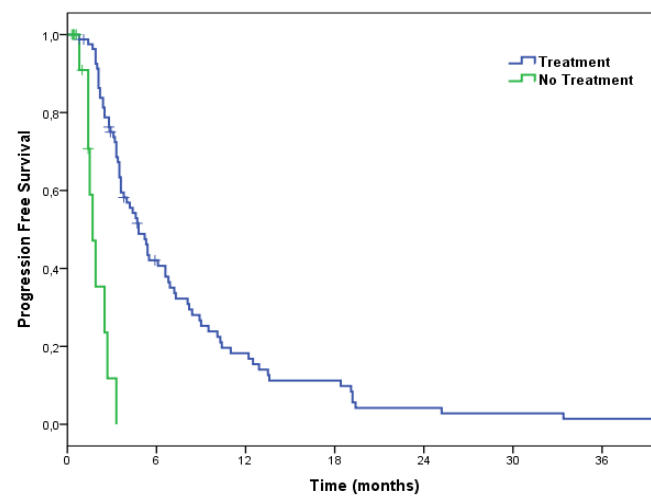

**Figure S9.** PFS Kaplan-Meier curves for the active oncological treatment: yes (median PFS=4.8 months) vs no (median PFS=1.7 months).

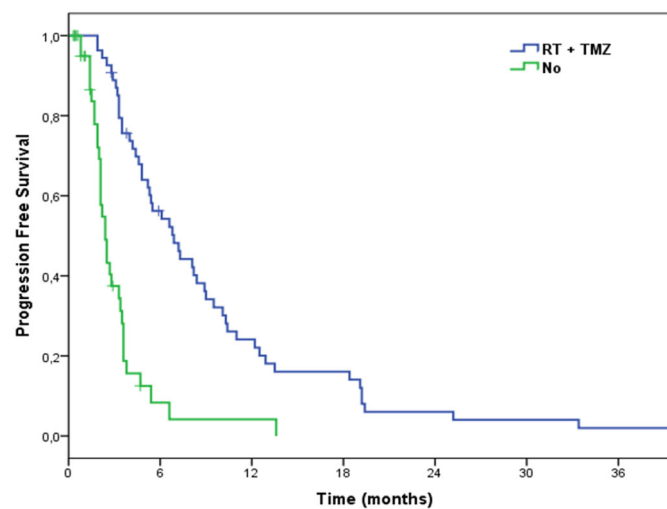

**Figure S10.** PFSS Kaplan-Meier curves for the RT+TMZ: yes (medianOS=6.9 months) vs no (median PFS=2.4 months).

**Table S2.** Adverse events according to the CTCAE v5.0 classification.

| Adverse events             |    | Active oncol.    |   | RT+TMZ | TMZ alone | RT alone |      |
|----------------------------|----|------------------|---|--------|-----------|----------|------|
|                            |    | Treatment (N.82) |   | (N.54) | (N.26)    | (N.2)    |      |
| Hematological              |    |                  |   |        |           |          |      |
| Anemia                     |    |                  |   | 9      | 5         | 0        | (0%) |
| Grade 1                    | 14 | (17%)            |   | (17    | (19       | 0        | (0%) |
| 2                          | 2  | (2%)             |   | %)     | %)        | 0        | (0%) |
| 3                          | 0  | (0%)             | 1 | (2%)1  | (4%)      |          |      |
| 4                          |    |                  | 0 | (0%)0  | (0%)      |          |      |
|                            | 1  | (1%)             | 1 | (2%)0  | (0%)0     |          | (0%) |
| Neutropenia                |    |                  |   |        |           |          |      |
| Grade 1                    | 1  | (1%)             | 1 | (2%)0  | (0%)0     |          | (0%) |
| 2                          | 1  | (1%)             | 1 | (2%)0  | (0%)0     |          | (0%) |
| 3                          | 0  | (0%)             | 0 | (0%)0  | (0%)0     |          | (0%) |
| 4                          | 3  | (4%)             | 1 | (2%)2  | (8%)0     |          | (0%) |
| Thrombocytopenia           |    |                  |   |        |           |          |      |
|                            |    |                  |   | 6      | 9         | 0        | (0%) |
| Grade 1                    | 15 | (18%)            |   | (11    | (35       | 0        | (0%) |
| 2                          | 3  | (4%)             |   | %)     | %)        | 0        | (0%) |
| 3                          | 3  | (4%)             | 3 | (6%)0  | (0%)0     |          | (0%) |
| 4                          | 3  | (4%)             | 2 | (4%)1  | (4%)      |          |      |
|                            |    |                  | 2 | (4%)1  | (4%)      |          |      |
| Febrile Neutropenia        |    |                  |   |        |           |          |      |
| Grade 3                    | 1  | (1%)             | 1 | (2%)0  | (0%)0     |          | (0%) |
| 4                          | 0  | (0%)             | 0 | (0%)0  | (0%)0     |          | (0%) |
| Gastrointestinal disorders |    |                  |   |        |           |          |      |
| Nausea                     |    |                  |   |        |           |          |      |
| Grade 1                    | 4  | (5%)             | 4 | (5%)4  | (5%)0     |          | (0%) |
| 2                          | 1  | (1%)             | 1 | (1%)1  | (1%)0     |          | (0%) |
| 3                          | 0  | (0%)             | 0 | (0%)0  | (0%)0     |          | (0%) |
| Constipation               |    |                  |   |        |           |          |      |
|                            |    |                  |   |        | 4         | 0        | (0%) |
| Grade 1                    | 5  | (6%)             | 1 | (2%)   | (15       | 0        | (0%) |
| 2                          | 0  | (0%)             | 0 | (0%)   | %)        | 0        | (0%) |
| 3                          | 1  | (1%)             | 1 | (2%)0  | (0%)0     |          | (0%) |
| 4                          | 0  | (0%)             | 0 | (0%)0  | (0%)      |          |      |
|                            |    |                  |   | 0      | (0%)      |          |      |
| AST/ALT elevation          |    |                  |   |        |           |          |      |
| Grade 1                    | 6  | (7%)             | 4 | (7%)2  | (8%)0     |          | (0%) |
| 2                          | 1  | (1%)             | 0 | (0%)1  | (4%)0     |          | (0%) |
| 3                          | 0  | (0%)             | 0 | (0%)0  | (0%)0     |          | (0%) |
| 4                          | 0  | (0%)             | 0 | (0%)0  | (0%)0     |          | (0%) |
| GGT elevation              |    |                  |   |        |           |          |      |
| Grade 1                    | 0  | (0%)             | 0 | (0%)0  | (0%)0     |          | (0%) |
| 2                          | 0  | (0%)             | 0 | (0%)0  | (0%)0     |          | (0%) |
| 3                          | 1  | (1%)             | 0 | (0%)1  | (4%)0     |          | (0%) |
| 4                          | 0  | (0%)             | 0 | (0%)0  | (0%)0     |          | (0%) |
| Hyperbilirubinemia         |    |                  |   |        |           |          |      |
| Grade 1                    | 1  | (1%)             | 1 | (2%)0  | (0%)0     |          | (0%) |
| 2                          | 0  | (0%)             | 0 | (0%)0  | (0%)0     |          | (0%) |
| 3                          | 0  | (0%)             | 0 | (0%)0  | (0%)0     |          | (0%) |
| 4                          | 0  | (0%)             | 0 | (0%)0  | (0%)0     |          | (0%) |

| General disorders |   |       |   |       |   |       |      |
|-------------------|---|-------|---|-------|---|-------|------|
| Fatigue           |   |       |   | 7     |   | 0     | (0%) |
| Grade 1           | 9 | (11%) |   | (13   | 2 | (8%)0 | (0%) |
| 2                 | 3 | (4%)  |   | %)    | 1 | (4%)0 | (0%) |
| 3                 | 0 | (0%)  | 2 | (4%)0 |   | (0%)  |      |
|                   |   |       | 0 | (0%)  |   |       |      |
| Infections        |   |       |   |       |   |       |      |
| Herpes zoster     | 1 | (1%)  | 1 | (2%)0 |   | (0%)0 | (0%) |

RT=Temozolomide; RT=Radiotherapy; AST=Aspartate transaminase; ALT=Alanine transaminase; GGT=Gamma-glutamyl transferase.
